# Supplementary material
Source: PubMed Central journal article supplement (PMC2685055)
Supplement: mol.108.050567_1.pdf [file mol.108.050567_1.pdf]

## Supplemental Information

### THIOPHENECARBOXYLATE SUPPRESSOR OF CYCLIC NUCLEOTIDES DISCOVERED IN A SMALL-MOLECULE SCREEN BLOCKS TOXIN-INDUCED INTESTINAL FLUID SECRETION

Lukmanee Tradtrantip, Buranee Yangthara, Prashant Padmawar,  
Christopher Morrison, and A.S. Verkman

IC<sub>50</sub> values for indicated compounds showed relative to that of the most active compound, *endo* CNT<sub>inh</sub>-03. Measurements done by platereader assay.

| Name                               | Structure                                                                           | MW  | Relative IC <sub>50</sub> |
|------------------------------------|-------------------------------------------------------------------------------------|-----|---------------------------|
| <i>endo</i> CNT <sub>inh</sub> -03 | 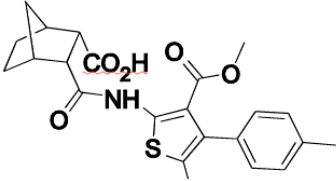  | 428 | 1                         |
| CNT <sub>inh</sub> -06             |  | 262 | 20                        |
| CNT <sub>inh</sub> -07             |  | 477 | inactive                  |

|                             |                                                                                     |     |                 |
|-----------------------------|-------------------------------------------------------------------------------------|-----|-----------------|
| <b>CNT<sub>inh</sub>-08</b> | 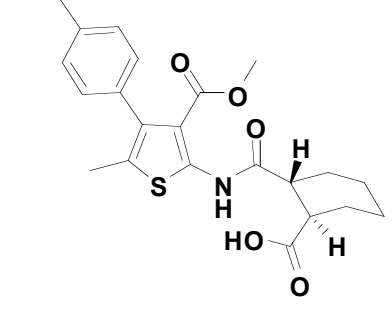   | 415 | <b>3</b>        |
| <b>CNT<sub>inh</sub>-09</b> |    | 463 | <b>5</b>        |
| <b>CNT<sub>inh</sub>-10</b> |   | 184 | <b>inactive</b> |
| <b>CNT<sub>inh</sub>-11</b> |  | 425 | <b>2</b>        |
| <b>CNT<sub>inh</sub>-12</b> |  | 244 | <b>inactive</b> |
| <b>CNT<sub>inh</sub>-13</b> |  | 545 | <b>6</b>        |

|                             |                                                                                    |     |                 |
|-----------------------------|------------------------------------------------------------------------------------|-----|-----------------|
| <b>CNT<sub>inh</sub>-14</b> | 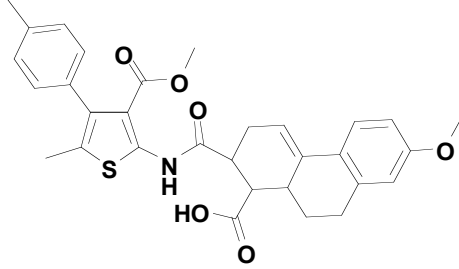  | 545 | <b>inactive</b> |
| <b>CNT<sub>inh</sub>-15</b> |   | 686 | <b>10</b>       |
| <b>CNT<sub>inh</sub>-16</b> |  | 523 | <b>30</b>       |
